# Supplementary material for: Albuminuria detection using graphene oxide-mediated fluorescence quenching aptasensor
Source: PubMed Central journal article supplement (PMC7644748; doi:10.1016/j.mex.2020.101114), 2020-10-20
Supplement: mmc1.pdf [file mmc1.pdf]

**Submitted to MethodsX**

**Supporting Information**

**Albuminuria detection using graphene oxide-mediated fluorescence quenching aptasensor**

Wireeya Chawjiraphan<sup>a</sup>, Chayachon Apiwat<sup>a,c</sup>, Khoonsake Segkhoonthod<sup>a</sup>, Kiatnida Treerattrakoon<sup>a,f</sup>, Preedee Pinpradup<sup>a</sup>, Nuankanya Sathirapongsasuti<sup>b</sup>, Prapasiri Pongprayoon<sup>c,d</sup>, Patraporn Luksirikul<sup>c,d</sup>, Patcharee Isarankura-Na-Ayudhya<sup>e</sup>, Deanpen Japrun<sup>a\*</sup>

<sup>a</sup>National Nanotechnology Center (NANOTEC), National Science and Technology Development Agency (NSTDA), Thailand Science Park, Pathumthani, Thailand

<sup>b</sup>Section for Translational Medicine, Faculty of Medicine Ramathibodi Hospital, Mahidol University, Bangkok, Thailand

<sup>c</sup>Department of Chemistry, Faculty of Science, Kasetsart University, Bangkok, Thailand

<sup>d</sup>Center for Advanced Studies in Nanotechnology for Chemical, Food and Agricultural Industries, KU Institute for Advanced Studies, Kasetsart University, Bangkok, Thailand.

<sup>e</sup>Department of Medical Technology, Faculty of Allied Health Science, Thammasat University, Pathumthani, Thailand

<sup>f</sup>Department of Pure and Applied Chemistry, Technology and Innovation Centre, University of Strathclyde, Glasgow, United Kingdom

\*Corresponding author: deanpen@nanotec.or.th

Phone number: +66 2564 6985

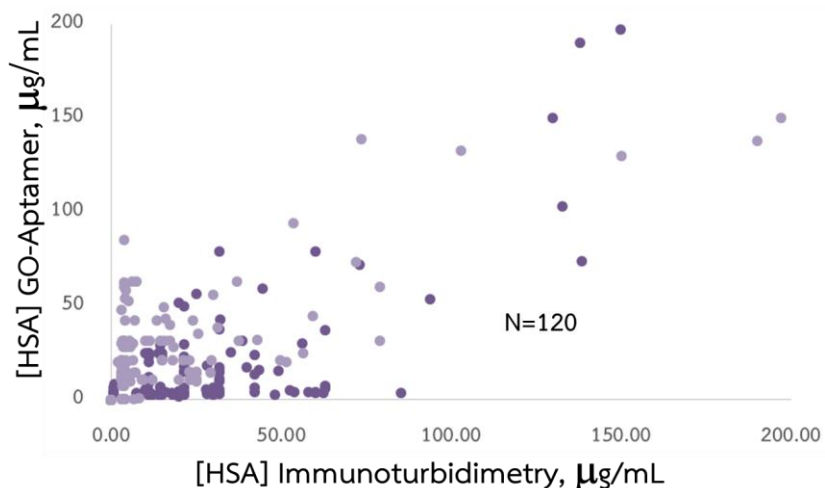

**Figure S1:** Correlation of the HSA concentrations (N=120) measured by graphene oxide-mediated fluorescence quenching aptasensor (y-axis) with those obtained by the standard methods, immunoturbidimetry (x-axis).

**Table S1:** Human Serum Albumin concentration ( $\mu\text{g/mL}$ ) analyzed by our developed method comparing with immunotubidimetry method (Standard method used in the hospital)

| Urine sample number | Human serum albumin concentration ( $\mu\text{g/mL}$ ) |                          | Patient information     |
|---------------------|--------------------------------------------------------|--------------------------|-------------------------|
|                     | Our developed method                                   | Immunotubidimetry method |                         |
| 1                   | 11.01                                                  | 20                       | Healthy control (No DM) |
| 2                   | 1.00                                                   | 8.3                      | Healthy control (No DM) |
| 3                   | 11.01                                                  | 12.2                     | Healthy control (No DM) |
| 4                   | 0.64                                                   | 6.6                      | Healthy control (No DM) |
| 5                   | 0.64                                                   | 3                        | Healthy control (No DM) |
| 6                   | 10.00                                                  | 5.7                      | Healthy control (No DM) |
| 7                   | 21.37                                                  | 15                       | Healthy control (No DM) |
| 8                   | 21.37                                                  | 18                       | Healthy control (No DM) |
| 9                   | 14.46                                                  | 29.2                     | Healthy control (No DM) |
| 10                  | 31.74                                                  | 10                       | Healthy control (No DM) |
| 11                  | 15.00                                                  | 3                        | Healthy control (No DM) |

|           |       |      |                         |
|-----------|-------|------|-------------------------|
| <b>12</b> | 56.22 | 30   | Healthy control (No DM) |
| <b>13</b> | 14.00 | 25   | Healthy control (No DM) |
| <b>14</b> | 15.00 | 23   | Healthy control (No DM) |
| <b>15</b> | 12.00 | 3    | Healthy control (No DM) |
| <b>16</b> | 31.74 | 17.2 | Healthy control (No DM) |
| <b>17</b> | 11.01 | 4.4  | Healthy control (No DM) |
| <b>18</b> | 42.11 | 13.4 | Healthy control (No DM) |
| <b>19</b> | 14.46 | 7.2  | Healthy control (No DM) |
| <b>20</b> | 28.00 | 5.6  | Healthy control (No DM) |
| <b>21</b> | 21.37 | 15   | Healthy control (No DM) |
| <b>22</b> | 14.46 | 6.7  | Healthy control (No DM) |
| <b>23</b> | 10.00 | 25   | Healthy control (No DM) |
| <b>24</b> | 11.01 | 25   | Healthy control (No DM) |
| <b>25</b> | 11.01 | 8.9  | Healthy control (No DM) |
| <b>26</b> | 21.37 | 21.3 | Healthy control (No DM) |
| <b>27</b> | 31.74 | 5.4  | Healthy control (No DM) |
| <b>28</b> | 49.22 | 15.4 | Healthy control (No DM) |
| <b>29</b> | 11.01 | 4.4  | Healthy control (No DM) |
| <b>30</b> | 20.00 | 3    | Healthy control (No DM) |
| <b>31</b> | 21.37 | 6.5  | Healthy control (No DM) |
| <b>32</b> | 11.01 | 4.7  | Healthy control (No DM) |
| <b>33</b> | 31.74 | 15.7 | Healthy control (No DM) |
| <b>34</b> | 28.29 | 18.4 | Healthy control (No DM) |
| <b>35</b> | 30.00 | 6.5  | Healthy control (No DM) |
| <b>36</b> | 20.00 | 4.6  | Healthy control (No DM) |

|           |        |       |                         |
|-----------|--------|-------|-------------------------|
| <b>37</b> | 43.40  | 16    | Healthy control (No DM) |
| <b>38</b> | 21.37  | 3     | Healthy control (No DM) |
| <b>39</b> | 31.74  | 3.4   | Healthy control (No DM) |
| <b>40</b> | 31.74  | 3.8   | Healthy control (No DM) |
| <b>41</b> | 85.35  | 3.9   | DM + Normal Kidney      |
| <b>42</b> | 0.64   | 3     | DM + Normal Kidney      |
| <b>43</b> | 30.00  | 3     | DM + Normal Kidney      |
| <b>44</b> | 31.74  | 37.6  | DM + Normal Kidney      |
| <b>45</b> | 20.00  | 3     | DM + Normal Kidney      |
| <b>46</b> | 28.29  | 4.4   | DM + Normal Kidney      |
| <b>47</b> | 7.55   | 3.4   | DM + Normal Kidney      |
| <b>48</b> | 58.16  | 4.2   | DM + Normal Kidney      |
| <b>49</b> | 15.00  | 25    | DM + Normal Kidney      |
| <b>50</b> | 42.11  | 6.8   | DM + Normal Kidney      |
| <b>51</b> | 21.37  | 29.6  | DM + Normal Kidney      |
| <b>52</b> | 11.01  | 4.9   | DM + Normal Kidney      |
| <b>53</b> | 20.00  | 3     | DM + Normal Kidney      |
| <b>54</b> | 31.74  | 14.5  | DM + Normal Kidney      |
| <b>55</b> | 52.48  | 5.1   | DM + Normal Kidney      |
| <b>56</b> | 11.01  | 25    | DM + Normal Kidney      |
| <b>57</b> | 11.01  | 23.9  | DM + Normal Kidney      |
| <b>58</b> | 11.01  | 3     | Non DM+ Normal CKD      |
| <b>59</b> | 93.94  | 53.6  | Non DM+ Normal CKD      |
| <b>60</b> | 31.74  | 79    | Non DM+ Normal CKD      |
| <b>61</b> | 73.21  | 72    | Non DM+ Normal CKD      |
| <b>62</b> | 138.56 | 73.7  | Non DM+ Normal CKD      |
| <b>63</b> | 343.24 | 113.3 | Non DM+ Normal CKD      |
| <b>64</b> | 20.00  | 51.6  | Non DM+ Normal CKD      |
| <b>65</b> | 21.37  | 3     | Non DM+ Normal CKD      |
| <b>66</b> | 60.00  | 79.1  | Non DM+ Normal CKD      |

|           |       |      |                    |
|-----------|-------|------|--------------------|
| <b>67</b> | 40.00 | 17.2 | Non DM+ Normal CKD |
| <b>68</b> | 44.56 | 59.3 | Non DM+ Normal CKD |
| <b>69</b> | 32.00 | 42.9 | Non DM+ Normal CKD |
| <b>70</b> | 62.84 | 7.5  | Non DM+ Normal CKD |
| <b>71</b> | 20.00 | 3    | Non DM+ Normal CKD |
| <b>72</b> | 11.01 | 3    | Non DM+ Normal CKD |
| <b>73</b> | 31.74 | 11.3 | Non DM+ Normal CKD |
| <b>74</b> | 42.11 | 24.1 | Non DM+ Normal CKD |
| <b>75</b> | 21.37 | 23.1 | Non DM+ Normal CKD |
| <b>76</b> | 38.65 | 31.3 | Non DM+ Normal CKD |
| <b>77</b> | 35.20 | 25.6 | Non DM+ Normal CKD |
| <b>78</b> | 62.84 | 6.1  | Non DM+ Normal CKD |
| <b>79</b> | 21.37 | 49.8 | Non DM+ Normal CKD |
| <b>80</b> | 48.06 | 3    | Non DM+ Normal CKD |
| <b>81</b> | 11.01 | 9.5  | Non DM+ Normal CKD |
| <b>82</b> | 11.01 | 22.9 | Non DM+ Normal CKD |
| <b>83</b> | 31.74 | 3.9  | Non DM+ Normal CKD |
| <b>84</b> | 42.11 | 4.1  | Non DM+ Normal CKD |
| <b>85</b> | 21.37 | 4.2  | Non DM+ Normal CKD |
| <b>86</b> | 60.10 | 4.1  | Non DM+ Normal CKD |
| <b>87</b> | 0.64  | 4.1  | Non DM+ Normal CKD |
| <b>88</b> | 28.29 | 3.5  | Non DM+ Normal CKD |
| <b>89</b> | 60.00 | 3.9  | Non DM+ Normal CKD |
| <b>90</b> | 53.89 | 4    | Non DM+ Normal CKD |
| <b>91</b> | 0.64  | 4    | Non DM+ Normal CKD |

|            |        |       |                                    |
|------------|--------|-------|------------------------------------|
| <b>92</b>  | 0.64   | 3.6   | Non DM+ Normal<br>CKD              |
| <b>93</b>  | 0.64   | 3.4   | Non DM+ Normal<br>CKD              |
| <b>94</b>  | 11.01  | 3.9   | Non DM+ Normal<br>CKD              |
| <b>95</b>  | 0.64   | 3.4   | Non DM+ Normal<br>CKD              |
| <b>96</b>  | 0.64   | 3.8   | Non DM+ Normal<br>CKD              |
| <b>97</b>  | 0.64   | 3.8   | Non DM+ Normal<br>CKD              |
| <b>98</b>  | 20.00  | 4.3   | Non DM+ Normal<br>CKD              |
| <b>99</b>  | 62.43  | 3.8   | Non DM+ Normal<br>CKD              |
| <b>100</b> | 17.92  | 3.8   | Non DM+ Normal<br>CKD              |
| <b>101</b> | 30.00  | 4.3   | Non DM+ Normal<br>CKD              |
| <b>102</b> | 7.55   | 3.9   | Non DM+ Normal<br>CKD              |
| <b>103</b> | 10.00  | 3.7   | Non DM+ Normal<br>CKD              |
| <b>104</b> | 62.04  | 221.3 | DM with severe<br>protein in urine |
| <b>105</b> | 62.84  | 37    | DM with severe<br>protein in urine |
| <b>106</b> | 100.00 | 204.5 | DM with severe<br>protein in urine |
| <b>107</b> | 150.00 | 197.2 | DM with severe<br>protein in urine |
| <b>108</b> | 138.00 | 190   | DM with severe<br>protein in urine |
| <b>109</b> | 132.73 | 102.9 | DM with severe<br>protein in urine |
| <b>110</b> | 130.00 | 150.1 | DM with severe<br>protein in urine |
| <b>111</b> | 25.00  | 56.5  | DM with severe<br>protein in urine |
| <b>112</b> | 19.00  | 3     | Normoproteinuric DM<br>+ CKD       |
| <b>113</b> | 14.00  | 3     | Normoproteinuric DM<br>+ CKD       |
| <b>114</b> | 16.00  | 4     | Normoproteinuric DM<br>+ CKD       |
| <b>115</b> | 18.00  | 3     | Normoproteinuric DM<br>+ CKD       |
| <b>116</b> | 20.00  | 2     | Normoproteinuric DM<br>+ CKD       |

|            |        |      |                           |
|------------|--------|------|---------------------------|
| <b>117</b> | 19.00  | 3    | Normoproteinuric DM + CKD |
| <b>118</b> | 524.47 | 36   | Normoproteinuric DM + CKD |
| <b>119</b> | 14.46  | 3.86 | Normoproteinuric DM + CKD |
| <b>120</b> | 12     | 3    | Normoproteinuric DM + CKD |
